# Supplementary material for: Multi-Gene Phylogeny and Taxonomy of Hydnellum (Bankeraceae, Basidiomycota) from China
Source: MDPI journal article supplement (doi:10.3390/jof7100818), 2021-09-29
Supplement: s1 [file s1]

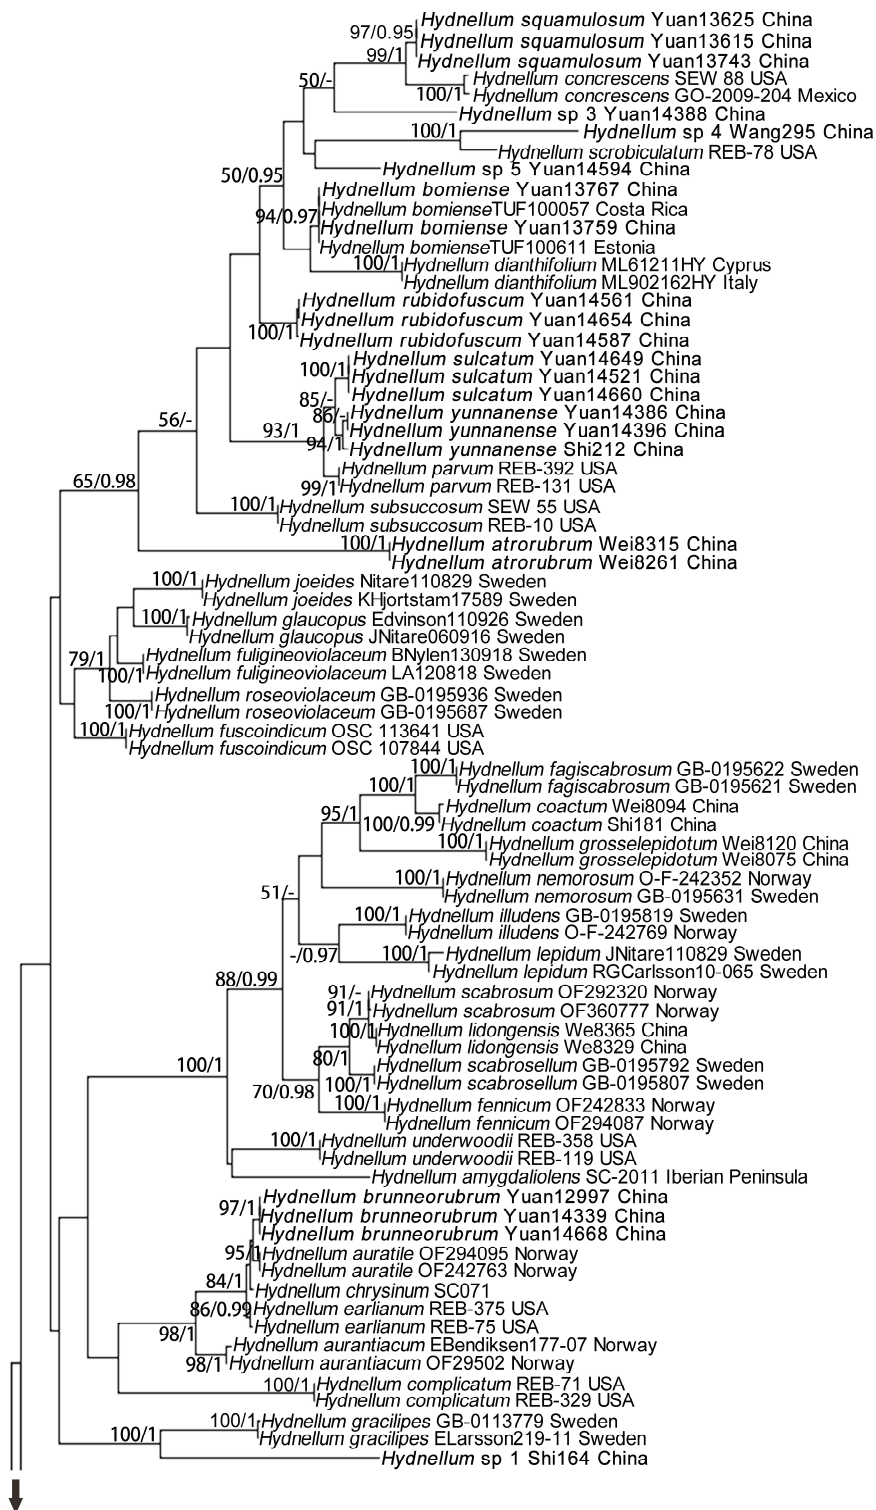

**Figure S1.** Maximum likelihood tree illustrating the phylogeny of *Hydnellum* and *Sarcodon* based on ITS sequence dataset. Branches are labeled with maximum likelihood bootstrap support greater than 50 % and Bayesian posterior probabilities greater than 0.95.

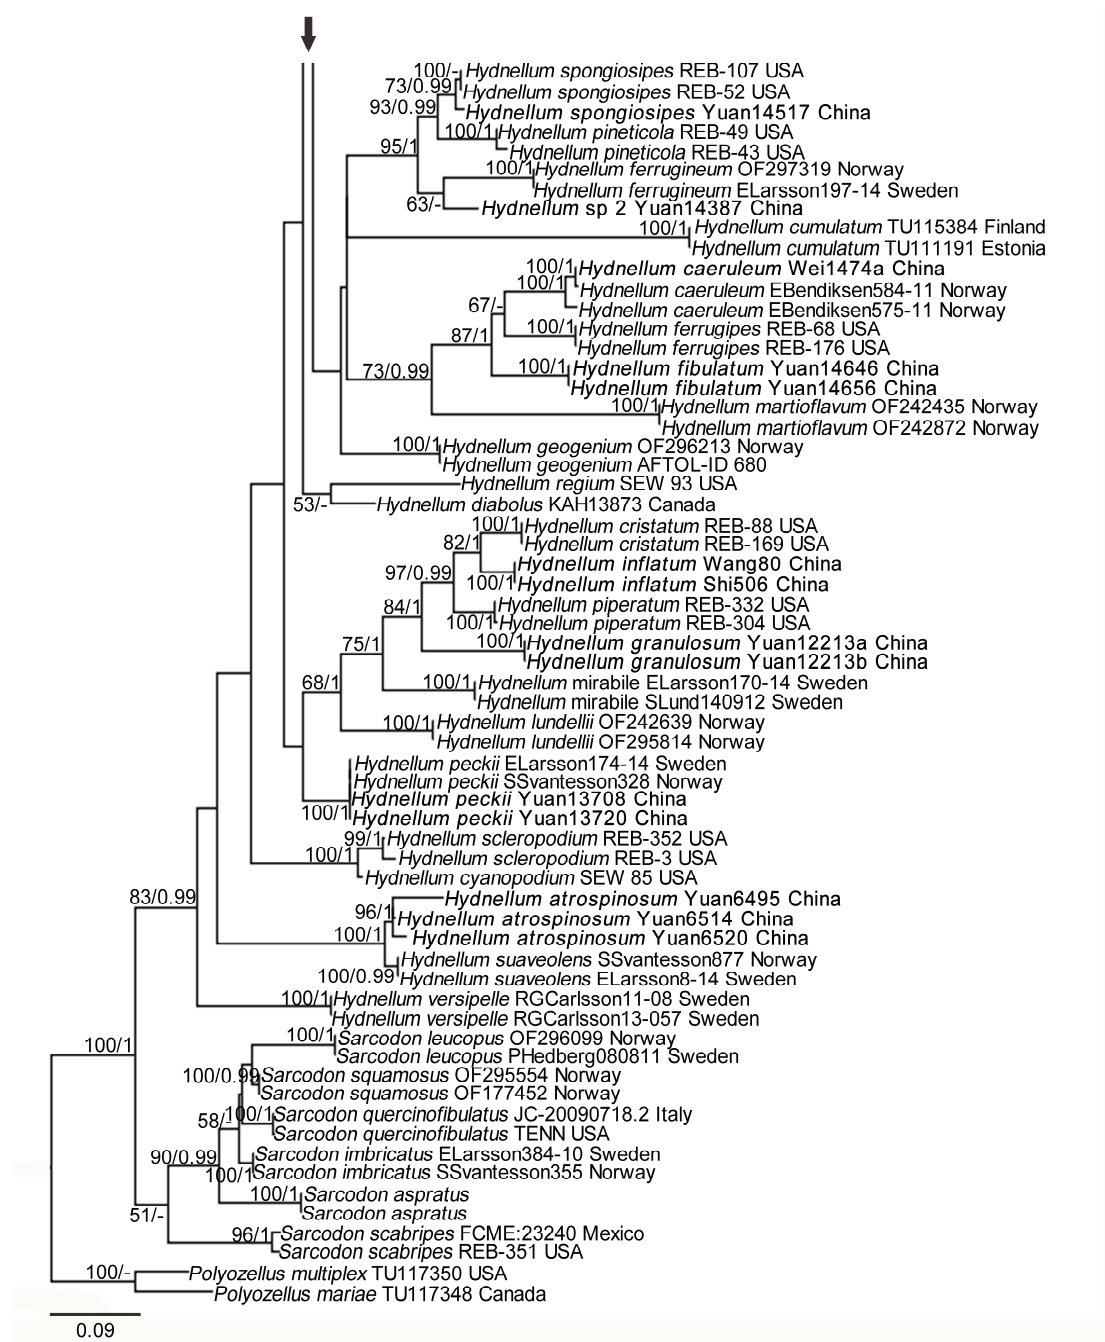

**Figure S1.** (continued)
